# Supplementary material for: Nickel(II) Complex of N4 Schiff Base Ligand as a Building Block for a Conducting Metallopolymer with Multiple Redox States
Source: MDPI journal article supplement (doi:10.3390/molecules26092646), 2021-04-30
Supplement: s1 [file s1]

# **Supplementary Materials**

## **Nickel(II) Complex of N<sub>4</sub> Schiff Base Ligand as a Building Block for a Conducting Metallopolymer with Multiple Redox States**

Mikhail Karushev\*, Evgenia Smirnova, Irina Chepurnaya

Ioffe Physical-Technical Institute of the Russian Academy of Sciences (Ioffe Institute),

26 Polytechnicheskaya str., St. Petersburg, 194021, Russia

\*corresponding author. e-mail: [mkarushev@mail.ioffe.ru](mailto:mkarushev@mail.ioffe.ru)

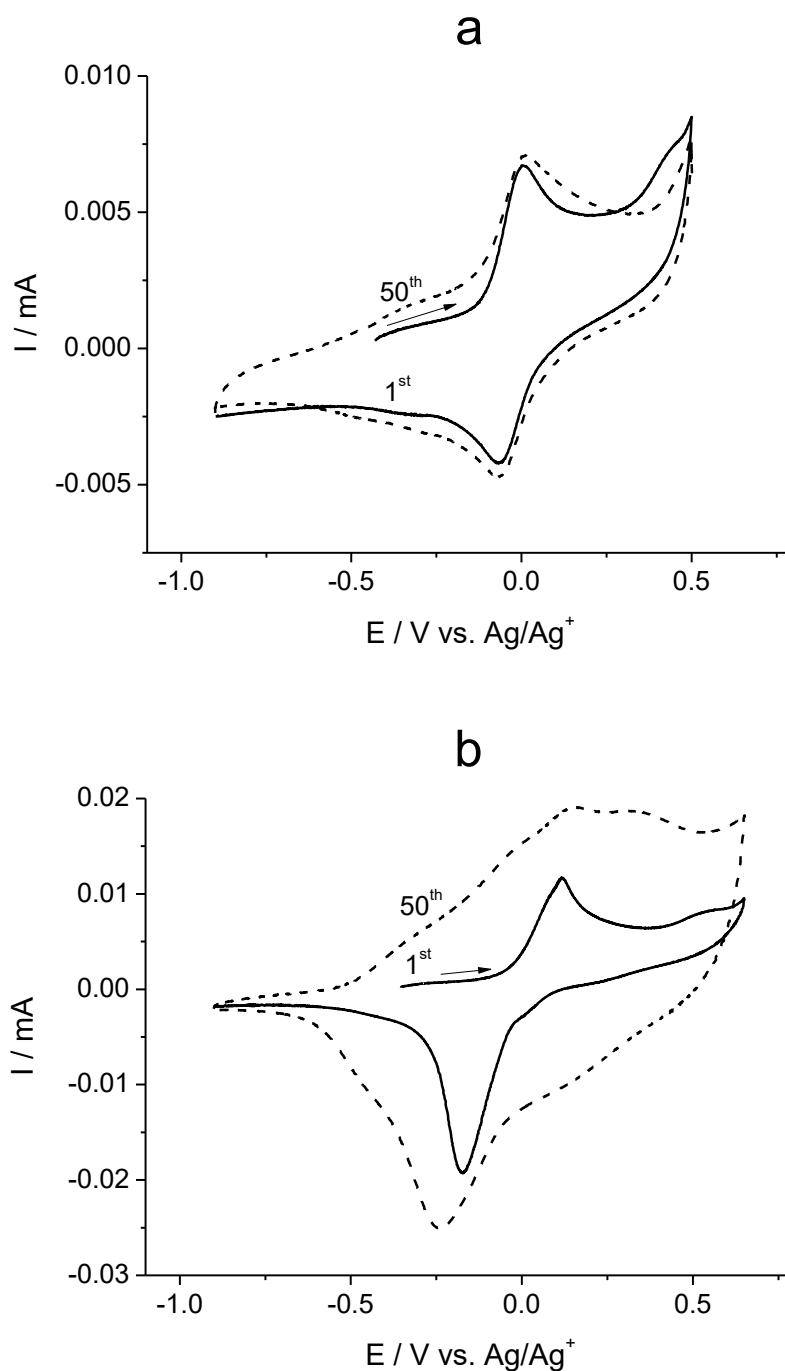

**Figure S1.** Cyclic voltammograms (50 consecutive cycles) of a glassy carbon electrode ( $0.07 \text{ cm}^2$ ) at a scan rate of  $0.05 \text{ V s}^{-1}$  in  $0.001 \text{ mol L}^{-1}$  solution of [NiAmben]: **(a)** in  $0.1 \text{ M Et}_4\text{NBF}_4/\text{EC}/\text{DEC}$  (50:50 v/v) between  $-0.9$  and  $0.5 \text{ V}$ ; **(b)** in  $0.05 \text{ M Et}_4\text{NBF}_4/\text{DCE}$  between  $-0.9$  and  $0.65 \text{ V}$ . The 1st and 50th cycles are shown.

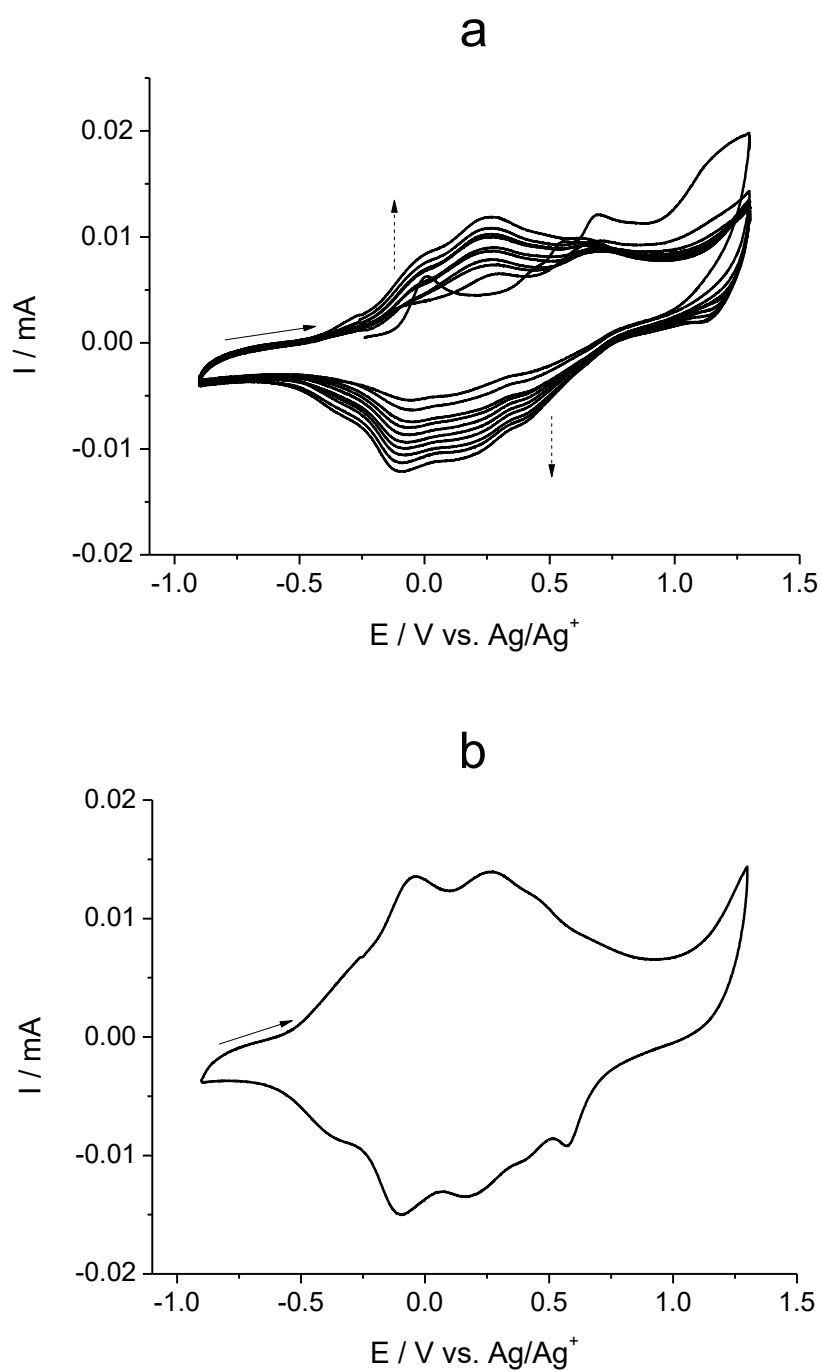

**Figure S2.** Cyclic voltammograms of a glassy carbon electrode ( $0.07 \text{ cm}^2$ ) in  $0.1 \text{ M Et}_4\text{NBF}_4/\text{EC}/\text{DEC}$  (50:50 v/v) between  $-0.9$  and  $1.3 \text{ V}$  at a scan rate of  $0.05 \text{ V s}^{-1}$  showing: (a) the anodic polymerization of  $0.001 \text{ mol L}^{-1}$  [NiAmben]; (b) the electrochemical response of the resulting poly-[NiAmben] film.

**Table S1.** Coulombic efficiency of poly-[NiAmben] in the potential range between  $-0.9$  and  $1.3$  V in  $0.05$  M  $\text{Et}_4\text{NBF}_4/\text{DCE}$ .

| Scan rate, $\nu_s$ ( $\text{V s}^{-1}$ ) | Injected (oxidation)<br>charge, $Q_{ox}$ (mC) | Recovered (reduction)<br>charge, $Q_{red}$ (mC) | Coulombic efficiency,<br>$Q_{red} / Q_{ox}$ |
|------------------------------------------|-----------------------------------------------|-------------------------------------------------|---------------------------------------------|
| 0.005                                    | 3.74                                          | 2.60                                            | 0.70                                        |
| 0.01                                     | 3.33                                          | 2.58                                            | 0.77                                        |
| 0.025                                    | 2.95                                          | 2.58                                            | 0.87                                        |
| 0.05                                     | 2.83                                          | 2.54                                            | 0.90                                        |
| 0.1                                      | 2.67                                          | 2.50                                            | 0.94                                        |
| 0.2                                      | 2.55                                          | 2.43                                            | 0.95                                        |

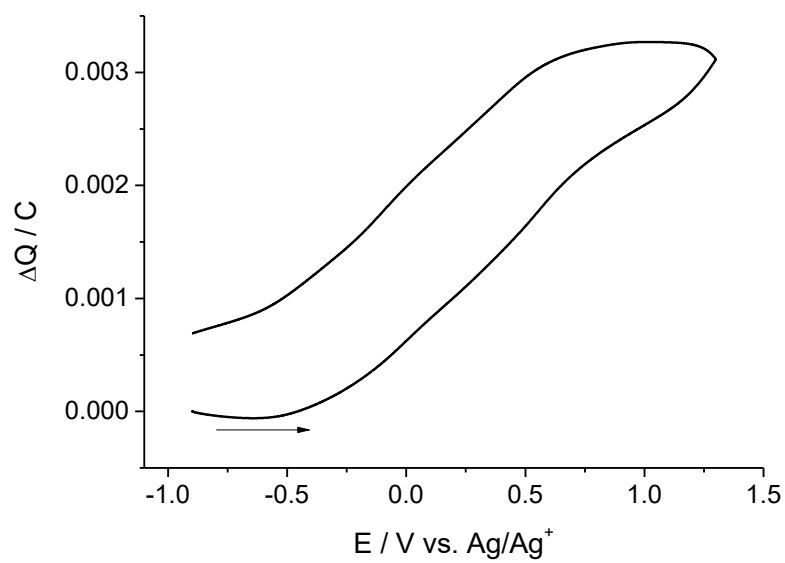

**Figure S3.** Dependence of the redox charge  $\Delta Q$  on the electrode potential  $E$  for the CV curve of poly-[NiAmben] shown in Figure 6b.

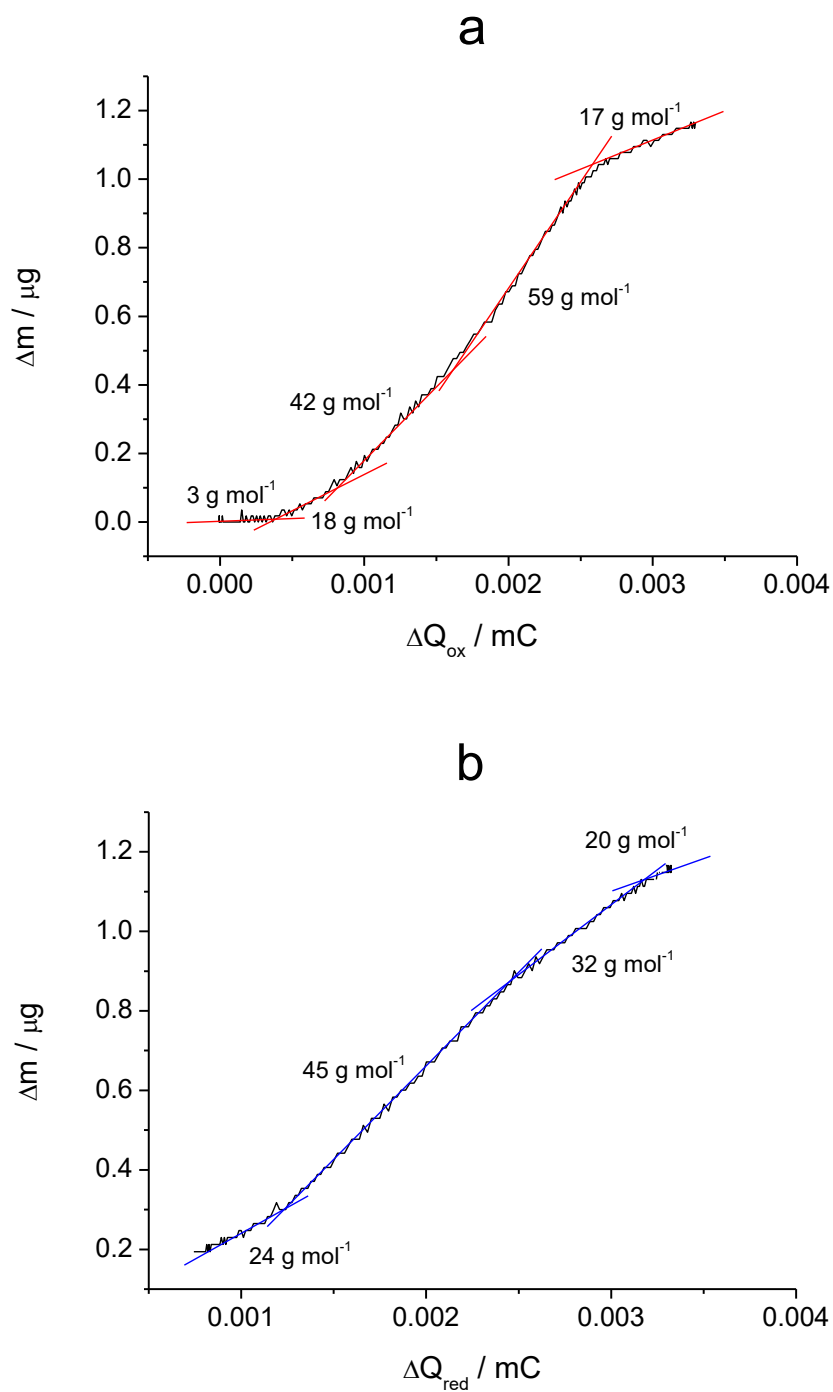

**Figure S4.** Mass-charge plots for the EQCM test of poly-[NiAmben] shown in Figure 6b: **(a)** polymer oxidation; **(b)** polymer reduction.

**Table S2.** Effective molar mass of electrolyte species,  $M_{red}$ , and the number of electrons per repeat unit,  $n$ , exchanged during voltammetric reduction of poly-[NiAmben] in 0.05 M Et<sub>4</sub>NBF<sub>4</sub>/DCE at 0.01 V s<sup>-1</sup> scan rate.

| Potential range, V | Effective molar mass of<br>electrolyte species,<br>$M_{red}$ (g mol <sup>-1</sup> ) | Electrons exchanged per<br>repeat unit, $n_{red}$ |
|--------------------|-------------------------------------------------------------------------------------|---------------------------------------------------|
| 0.93 to 0.66       | 20                                                                                  | 0.08                                              |
| 0.66 to 0.24       | 32                                                                                  | 0.43                                              |
| 0.24 to -0.41      | 45                                                                                  | 0.81                                              |
| -0.41 to -0.9      | 24                                                                                  | 0.3                                               |

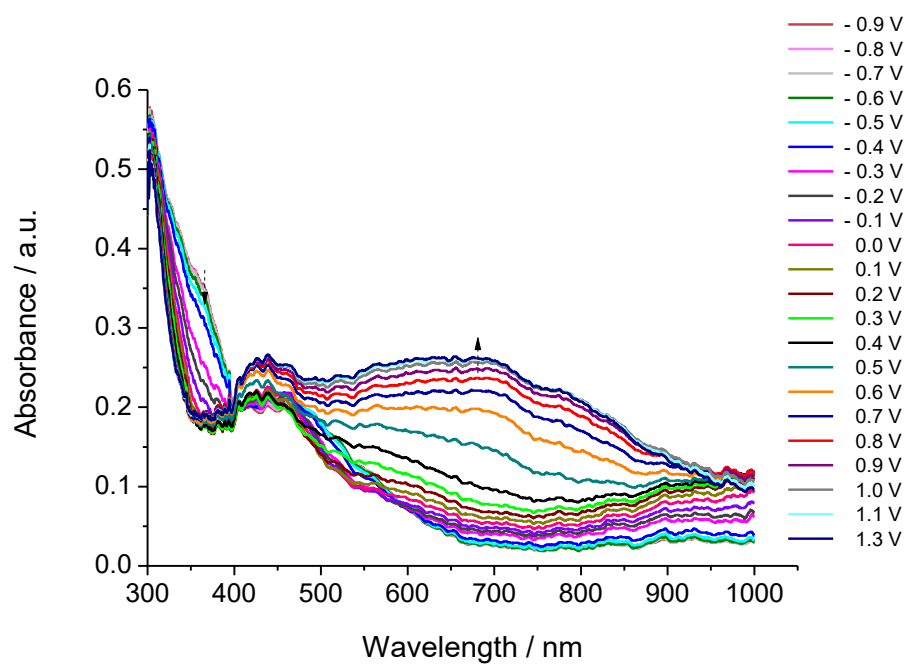

**Figure S5.** UV-Vis spectra of a poly-[NiAmben]-modified ITO-coated glass electrode collected in 0.05 M Et<sub>4</sub>NBF<sub>4</sub>/DCE in the potential range from -0.9 to 1.3 V.

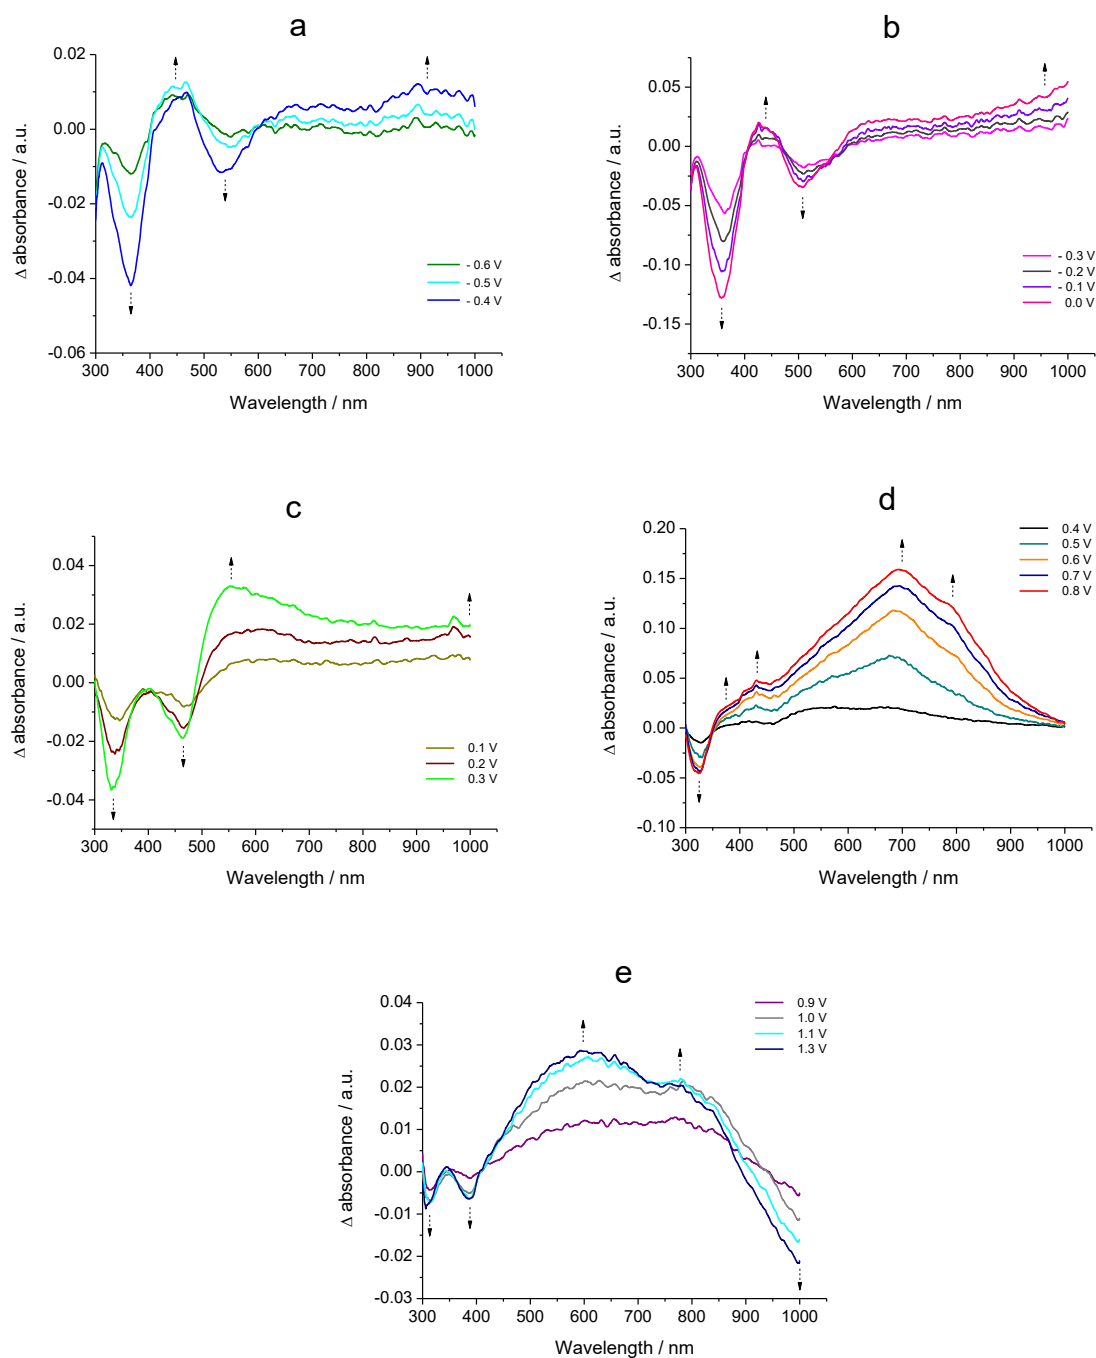

**Figure S6.** Differential UV-Vis spectra of a poly-[NiAmben]-modified ITO-coated glass electrode during redox switching in 0.05 M Et<sub>4</sub>NBF<sub>4</sub>/DCE: **(a)** spectra from  $-0.8$  to  $-0.4$  V, referenced to the spectrum of the polymer at  $-0.9$  V; **(b)** spectra from  $-0.3$  to  $0.0$  V, referenced to the spectrum of the polymer at  $-0.4$  V; **(c)** spectra from  $0.1$  to  $0.3$  V, referenced to the spectrum of the polymer at  $0.0$  V; **(d)** spectra from  $0.4$  to  $0.8$  V, referenced to the spectrum of the polymer at  $0.3$  V; **(e)** spectra from  $0.9$  to  $1.3$  V, referenced to the spectrum of the polymer at  $0.8$  V.

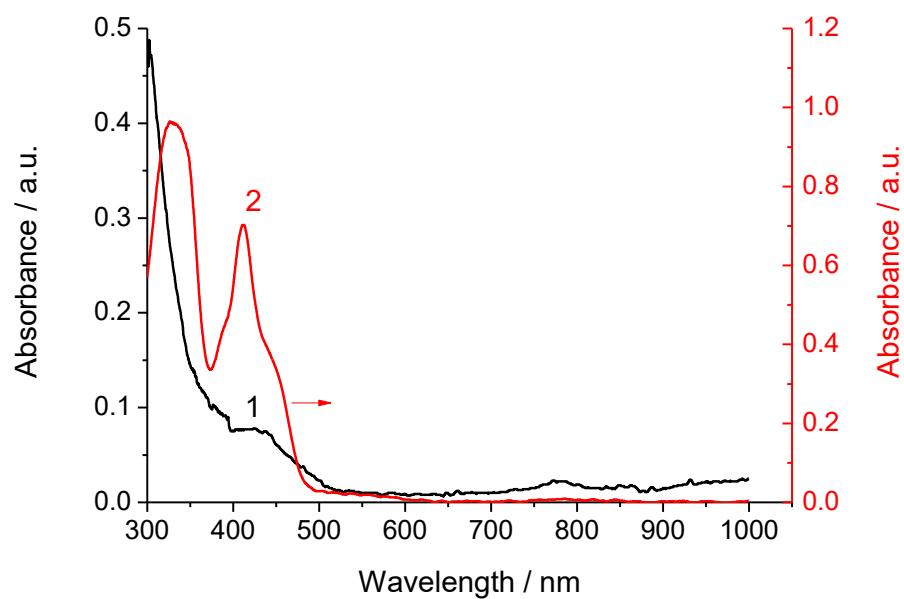

**Figure S7.** UV-Vis spectra of a poly-[NiSalen]-modified ITO-coated glass electrode at  $-0.3$  V acquired in  $0.05$  M  $\text{Et}_4\text{NBF}_4/\text{DCE}$  (black curve 1) and the spectrum of [NiSalen] monomer (red curve 2).

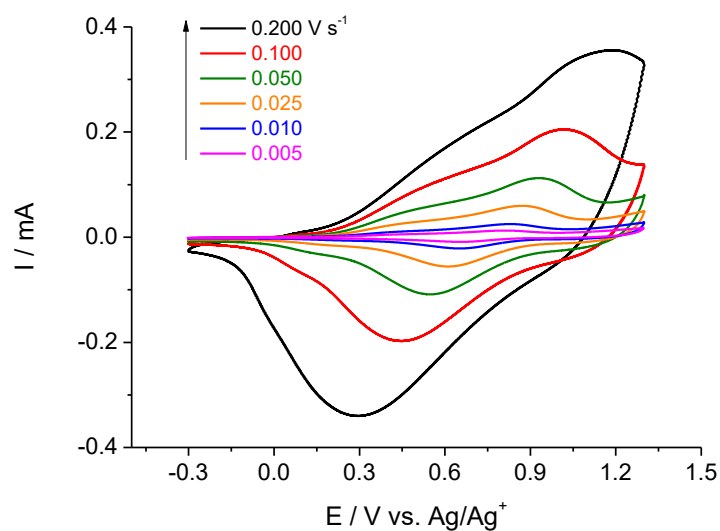

**Figure S8.** CV curves of a poly-[NiSalen]-modified Pt-coated quartz crystal electrode ( $1.37 \text{ cm}^2$ ) in  $0.05 \text{ M Et}_4\text{NBF}_4/\text{DCE}$  between  $-0.3$  and  $1.3 \text{ V}$  at different scan rates ( $0.005$ – $0.2 \text{ V s}^{-1}$ ).

**Table S3.** Coulombic efficiency of poly-[NiSalen] in the potential range between  $-0.3$  and  $1.3 \text{ V}$  in  $0.05 \text{ M Et}_4\text{NBF}_4/\text{DCE}$  at different scan rates (calculated from the CV data shown in Figure S8).

| Scan rate,<br>$v_s (\text{V s}^{-1})$ | Injected (oxidation)<br>charge,<br>$Q_{ox} (\text{mC})$ | Recovered<br>(reduction) charge,<br>$Q_{red} (\text{mC})$ | Coulombic<br>efficiency,<br>$Q_{red} / Q_{ox}$ |
|---------------------------------------|---------------------------------------------------------|-----------------------------------------------------------|------------------------------------------------|
| 0.005                                 | 2.09                                                    | 0.91                                                      | 0.44                                           |
| 0.01                                  | 1.86                                                    | 1.10                                                      | 0.59                                           |
| 0.025                                 | 1.66                                                    | 1.21                                                      | 0.73                                           |
| 0.05                                  | 1.55                                                    | 1.29                                                      | 0.83                                           |
| 0.1                                   | 1.46                                                    | 1.29                                                      | 0.88                                           |
| 0.2                                   | 1.32                                                    | 1.23                                                      | 0.93                                           |

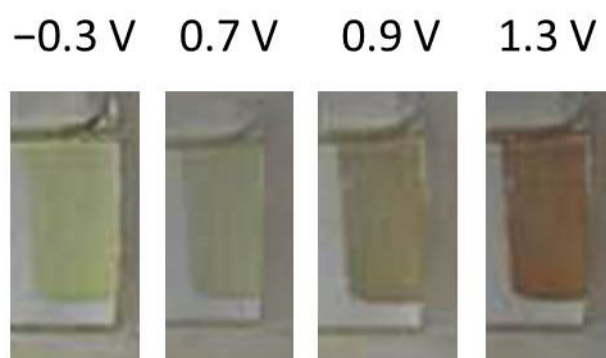

**Figure S9.** The color change of the poly-[NiSalen] film with varying potentials.
